# Supplementary material for: Does Parental Alcohol Use Influence Children’s Age at First Alcohol Intake? A Retrospective Study of Patients with Alcohol Dependence
Source: MDPI journal article supplement (doi:10.3390/healthcare9070841), 2021-07-03
Supplement: s1 [file s1]

## Supplementary Material

**Table S1.** Descriptive statistics of current age, age at first alcohol intake, and AUDIT scores among male ( $n = 237$ ) and female ( $n = 57$ ) patients with alcohol dependence.

|                             | <b>M</b> | <b>Me</b> | <b>SD</b> | <b>Sk</b> | <b>Kurt</b> | <b>Min</b> | <b>Max</b> | <b>D</b> | <b><i>p</i></b> |
|-----------------------------|----------|-----------|-----------|-----------|-------------|------------|------------|----------|-----------------|
| <b>Females</b>              |          |           |           |           |             |            |            |          |                 |
| Current age                 | 45.14    | 45.0      | 11.56     | -0.04     | -1.24       | 26         | 65         | 0.09     | 0.200           |
| Age at first alcohol intake | 18.00    | 17.0      | 5.98      | 2.90      | 9.24        | 10         | 43         | 0.31     | <0.001          |
| AUDIT score                 | 22.84    | 22.0      | 7.89      | 0.03      | -0.73       | 6          | 37         | 0.09     | 0.200           |
| <b>Males</b>                |          |           |           |           |             |            |            |          |                 |
| Current age                 | 43.54    | 42.0      | 10.81     | 0.46      | -0.53       | 22         | 73         | 0.08     | <0.001          |
| Age at first alcohol intake | 15.69    | 16.0      | 3.81      | 0.42      | 4.53        | 3          | 34         | 0.15     | <0.001          |
| AUDIT score                 | 27.70    | 28.0      | 7.27      | -0.36     | -0.51       | 4          | 40         | 0.07     | 0.005           |

M—Mean; Me—Median; SD—Standard Deviation; Sk—skewness; Kurt—kurtosis; Min—minimal value; Max—maximal value; D—Lilliefors corrected Kolmogorov-Smirnov test value; *p*—level of statistical significance.
